# Supplementary material for: Improvement in Group Identification of Dojo Loach, Misgurnus Anguillicaudatus, Using PCR-Restriction Fragment Length Polymorphism
Source: Research Square preprint supplement (doi:10.21203/rs.3.rs-416860/v1), 2021-05-24
Supplement: Supplementary file 1 [file 6a7d5800c855e4922acf1a86.pdf]

**Supplementary Table S1** MtDNA and nuclear genomes of all samples used in this study<sup>†</sup>

| Site no.                                                                                                                                                                                                                                                                                                                                                                                                                                                                                                                                                                                                                                                                                                                                                                                                                                                                                                                                                                                                                                                                                                                                                                              | Prefecture | Localities (city, town, or village) | Individual no. | <i>HaeIII</i> | <i>HinfI</i> | CR-RFLP | MtDNA genome | ManDra-A    | ManDra-B | <i>RAG1</i> -RFLP | Nuclear genome |   |   |   |   |           |   |        |         |           |   |   |   |   |           |   |        |         |           |   |   |   |   |          |   |        |     |          |   |   |   |   |          |   |        |     |          |   |   |   |   |          |   |        |     |          |   |   |   |   |          |   |        |     |          |   |   |   |   |          |   |        |     |          |   |   |   |   |          |   |        |     |          |
|---------------------------------------------------------------------------------------------------------------------------------------------------------------------------------------------------------------------------------------------------------------------------------------------------------------------------------------------------------------------------------------------------------------------------------------------------------------------------------------------------------------------------------------------------------------------------------------------------------------------------------------------------------------------------------------------------------------------------------------------------------------------------------------------------------------------------------------------------------------------------------------------------------------------------------------------------------------------------------------------------------------------------------------------------------------------------------------------------------------------------------------------------------------------------------------|------------|-------------------------------------|----------------|---------------|--------------|---------|--------------|-------------|----------|-------------------|----------------|---|---|---|---|-----------|---|--------|---------|-----------|---|---|---|---|-----------|---|--------|---------|-----------|---|---|---|---|----------|---|--------|-----|----------|---|---|---|---|----------|---|--------|-----|----------|---|---|---|---|----------|---|--------|-----|----------|---|---|---|---|----------|---|--------|-----|----------|---|---|---|---|----------|---|--------|-----|----------|---|---|---|---|----------|---|--------|-----|----------|
| 1                                                                                                                                                                                                                                                                                                                                                                                                                                                                                                                                                                                                                                                                                                                                                                                                                                                                                                                                                                                                                                                                                                                                                                                     | Hokkaido   | Akkeshi                             | 1              | A             | A            | I       | <b>A</b>     | smear       | ladder   | 245/198           | <b>A</b>       |   |   |   |   |           |   |        |         |           |   |   |   |   |           |   |        |         |           |   |   |   |   |          |   |        |     |          |   |   |   |   |          |   |        |     |          |   |   |   |   |          |   |        |     |          |   |   |   |   |          |   |        |     |          |   |   |   |   |          |   |        |     |          |   |   |   |   |          |   |        |     |          |
|                                                                                                                                                                                                                                                                                                                                                                                                                                                                                                                                                                                                                                                                                                                                                                                                                                                                                                                                                                                                                                                                                                                                                                                       |            |                                     | 2              | A             | A            | I       | <b>A</b>     | smear       | ladder   | 245/198           | <b>A</b>       |   |   |   |   |           |   |        |         |           |   |   |   |   |           |   |        |         |           |   |   |   |   |          |   |        |     |          |   |   |   |   |          |   |        |     |          |   |   |   |   |          |   |        |     |          |   |   |   |   |          |   |        |     |          |   |   |   |   |          |   |        |     |          |   |   |   |   |          |   |        |     |          |
|                                                                                                                                                                                                                                                                                                                                                                                                                                                                                                                                                                                                                                                                                                                                                                                                                                                                                                                                                                                                                                                                                                                                                                                       |            |                                     | 3              | A             | A            | I       | <b>A</b>     | smear       | ladder   | 245/198           | <b>A</b>       |   |   |   |   |           |   |        |         |           |   |   |   |   |           |   |        |         |           |   |   |   |   |          |   |        |     |          |   |   |   |   |          |   |        |     |          |   |   |   |   |          |   |        |     |          |   |   |   |   |          |   |        |     |          |   |   |   |   |          |   |        |     |          |   |   |   |   |          |   |        |     |          |
|                                                                                                                                                                                                                                                                                                                                                                                                                                                                                                                                                                                                                                                                                                                                                                                                                                                                                                                                                                                                                                                                                                                                                                                       |            |                                     | 4              | A             | A            | I       | <b>A</b>     | smear       | ladder   | 245/198           | <b>A</b>       |   |   |   |   |           |   |        |         |           |   |   |   |   |           |   |        |         |           |   |   |   |   |          |   |        |     |          |   |   |   |   |          |   |        |     |          |   |   |   |   |          |   |        |     |          |   |   |   |   |          |   |        |     |          |   |   |   |   |          |   |        |     |          |   |   |   |   |          |   |        |     |          |
|                                                                                                                                                                                                                                                                                                                                                                                                                                                                                                                                                                                                                                                                                                                                                                                                                                                                                                                                                                                                                                                                                                                                                                                       |            |                                     | 5              | A             | A            | I       | <b>A</b>     | smear       | ladder   | 245/198           | <b>A</b>       |   |   |   |   |           |   |        |         |           |   |   |   |   |           |   |        |         |           |   |   |   |   |          |   |        |     |          |   |   |   |   |          |   |        |     |          |   |   |   |   |          |   |        |     |          |   |   |   |   |          |   |        |     |          |   |   |   |   |          |   |        |     |          |   |   |   |   |          |   |        |     |          |
|                                                                                                                                                                                                                                                                                                                                                                                                                                                                                                                                                                                                                                                                                                                                                                                                                                                                                                                                                                                                                                                                                                                                                                                       |            |                                     | 6              | A             | A            | I       | <b>A</b>     | smear       | ladder   | 245/198           | <b>A</b>       |   |   |   |   |           |   |        |         |           |   |   |   |   |           |   |        |         |           |   |   |   |   |          |   |        |     |          |   |   |   |   |          |   |        |     |          |   |   |   |   |          |   |        |     |          |   |   |   |   |          |   |        |     |          |   |   |   |   |          |   |        |     |          |   |   |   |   |          |   |        |     |          |
|                                                                                                                                                                                                                                                                                                                                                                                                                                                                                                                                                                                                                                                                                                                                                                                                                                                                                                                                                                                                                                                                                                                                                                                       |            |                                     | 7              | A             | A            | I       | <b>A</b>     | smear       | ladder   | 245/198           | <b>A</b>       |   |   |   |   |           |   |        |         |           |   |   |   |   |           |   |        |         |           |   |   |   |   |          |   |        |     |          |   |   |   |   |          |   |        |     |          |   |   |   |   |          |   |        |     |          |   |   |   |   |          |   |        |     |          |   |   |   |   |          |   |        |     |          |   |   |   |   |          |   |        |     |          |
|                                                                                                                                                                                                                                                                                                                                                                                                                                                                                                                                                                                                                                                                                                                                                                                                                                                                                                                                                                                                                                                                                                                                                                                       |            |                                     | 8              | A             | A            | I       | <b>A</b>     | smear       | ladder   | 245/198           | <b>A</b>       |   |   |   |   |           |   |        |         |           |   |   |   |   |           |   |        |         |           |   |   |   |   |          |   |        |     |          |   |   |   |   |          |   |        |     |          |   |   |   |   |          |   |        |     |          |   |   |   |   |          |   |        |     |          |   |   |   |   |          |   |        |     |          |   |   |   |   |          |   |        |     |          |
| <table border="1" style="border-style: dashed; border-width: 2px;"> <tbody> <tr> <td>1</td> <td>-</td> <td>-</td> <td>-</td> <td><b>A</b></td> <td>-</td> <td>ladder</td> <td>443</td> <td><b>A</b></td> </tr> <tr> <td>2</td> <td>-</td> <td>-</td> <td>-</td> <td><b>A</b></td> <td>-</td> <td>ladder</td> <td>443</td> <td><b>A</b></td> </tr> <tr> <td>3</td> <td>-</td> <td>-</td> <td>-</td> <td><b>A</b></td> <td>-</td> <td>ladder</td> <td>443</td> <td><b>A</b></td> </tr> <tr> <td>4</td> <td>-</td> <td>-</td> <td>-</td> <td><b>A</b></td> <td>-</td> <td>ladder</td> <td>443</td> <td><b>A</b></td> </tr> <tr> <td>5</td> <td>-</td> <td>-</td> <td>-</td> <td><b>A</b></td> <td>-</td> <td>ladder</td> <td>443</td> <td><b>A</b></td> </tr> <tr> <td>6</td> <td>-</td> <td>-</td> <td>-</td> <td><b>A</b></td> <td>-</td> <td>ladder</td> <td>443</td> <td><b>A</b></td> </tr> <tr> <td>7</td> <td>-</td> <td>-</td> <td>-</td> <td><b>A</b></td> <td>-</td> <td>ladder</td> <td>443</td> <td><b>A</b></td> </tr> <tr> <td>8</td> <td>-</td> <td>-</td> <td>-</td> <td><b>A</b></td> <td>-</td> <td>ladder</td> <td>443</td> <td><b>A</b></td> </tr> </tbody> </table> |            |                                     |                |               |              |         |              |             |          |                   |                | 1 | - | - | - | <b>A</b>  | - | ladder | 443     | <b>A</b>  | 2 | - | - | - | <b>A</b>  | - | ladder | 443     | <b>A</b>  | 3 | - | - | - | <b>A</b> | - | ladder | 443 | <b>A</b> | 4 | - | - | - | <b>A</b> | - | ladder | 443 | <b>A</b> | 5 | - | - | - | <b>A</b> | - | ladder | 443 | <b>A</b> | 6 | - | - | - | <b>A</b> | - | ladder | 443 | <b>A</b> | 7 | - | - | - | <b>A</b> | - | ladder | 443 | <b>A</b> | 8 | - | - | - | <b>A</b> | - | ladder | 443 | <b>A</b> |
| 1                                                                                                                                                                                                                                                                                                                                                                                                                                                                                                                                                                                                                                                                                                                                                                                                                                                                                                                                                                                                                                                                                                                                                                                     | -          | -                                   | -              | <b>A</b>      | -            | ladder  | 443          | <b>A</b>    |          |                   |                |   |   |   |   |           |   |        |         |           |   |   |   |   |           |   |        |         |           |   |   |   |   |          |   |        |     |          |   |   |   |   |          |   |        |     |          |   |   |   |   |          |   |        |     |          |   |   |   |   |          |   |        |     |          |   |   |   |   |          |   |        |     |          |   |   |   |   |          |   |        |     |          |
| 2                                                                                                                                                                                                                                                                                                                                                                                                                                                                                                                                                                                                                                                                                                                                                                                                                                                                                                                                                                                                                                                                                                                                                                                     | -          | -                                   | -              | <b>A</b>      | -            | ladder  | 443          | <b>A</b>    |          |                   |                |   |   |   |   |           |   |        |         |           |   |   |   |   |           |   |        |         |           |   |   |   |   |          |   |        |     |          |   |   |   |   |          |   |        |     |          |   |   |   |   |          |   |        |     |          |   |   |   |   |          |   |        |     |          |   |   |   |   |          |   |        |     |          |   |   |   |   |          |   |        |     |          |
| 3                                                                                                                                                                                                                                                                                                                                                                                                                                                                                                                                                                                                                                                                                                                                                                                                                                                                                                                                                                                                                                                                                                                                                                                     | -          | -                                   | -              | <b>A</b>      | -            | ladder  | 443          | <b>A</b>    |          |                   |                |   |   |   |   |           |   |        |         |           |   |   |   |   |           |   |        |         |           |   |   |   |   |          |   |        |     |          |   |   |   |   |          |   |        |     |          |   |   |   |   |          |   |        |     |          |   |   |   |   |          |   |        |     |          |   |   |   |   |          |   |        |     |          |   |   |   |   |          |   |        |     |          |
| 4                                                                                                                                                                                                                                                                                                                                                                                                                                                                                                                                                                                                                                                                                                                                                                                                                                                                                                                                                                                                                                                                                                                                                                                     | -          | -                                   | -              | <b>A</b>      | -            | ladder  | 443          | <b>A</b>    |          |                   |                |   |   |   |   |           |   |        |         |           |   |   |   |   |           |   |        |         |           |   |   |   |   |          |   |        |     |          |   |   |   |   |          |   |        |     |          |   |   |   |   |          |   |        |     |          |   |   |   |   |          |   |        |     |          |   |   |   |   |          |   |        |     |          |   |   |   |   |          |   |        |     |          |
| 5                                                                                                                                                                                                                                                                                                                                                                                                                                                                                                                                                                                                                                                                                                                                                                                                                                                                                                                                                                                                                                                                                                                                                                                     | -          | -                                   | -              | <b>A</b>      | -            | ladder  | 443          | <b>A</b>    |          |                   |                |   |   |   |   |           |   |        |         |           |   |   |   |   |           |   |        |         |           |   |   |   |   |          |   |        |     |          |   |   |   |   |          |   |        |     |          |   |   |   |   |          |   |        |     |          |   |   |   |   |          |   |        |     |          |   |   |   |   |          |   |        |     |          |   |   |   |   |          |   |        |     |          |
| 6                                                                                                                                                                                                                                                                                                                                                                                                                                                                                                                                                                                                                                                                                                                                                                                                                                                                                                                                                                                                                                                                                                                                                                                     | -          | -                                   | -              | <b>A</b>      | -            | ladder  | 443          | <b>A</b>    |          |                   |                |   |   |   |   |           |   |        |         |           |   |   |   |   |           |   |        |         |           |   |   |   |   |          |   |        |     |          |   |   |   |   |          |   |        |     |          |   |   |   |   |          |   |        |     |          |   |   |   |   |          |   |        |     |          |   |   |   |   |          |   |        |     |          |   |   |   |   |          |   |        |     |          |
| 7                                                                                                                                                                                                                                                                                                                                                                                                                                                                                                                                                                                                                                                                                                                                                                                                                                                                                                                                                                                                                                                                                                                                                                                     | -          | -                                   | -              | <b>A</b>      | -            | ladder  | 443          | <b>A</b>    |          |                   |                |   |   |   |   |           |   |        |         |           |   |   |   |   |           |   |        |         |           |   |   |   |   |          |   |        |     |          |   |   |   |   |          |   |        |     |          |   |   |   |   |          |   |        |     |          |   |   |   |   |          |   |        |     |          |   |   |   |   |          |   |        |     |          |   |   |   |   |          |   |        |     |          |
| 8                                                                                                                                                                                                                                                                                                                                                                                                                                                                                                                                                                                                                                                                                                                                                                                                                                                                                                                                                                                                                                                                                                                                                                                     | -          | -                                   | -              | <b>A</b>      | -            | ladder  | 443          | <b>A</b>    |          |                   |                |   |   |   |   |           |   |        |         |           |   |   |   |   |           |   |        |         |           |   |   |   |   |          |   |        |     |          |   |   |   |   |          |   |        |     |          |   |   |   |   |          |   |        |     |          |   |   |   |   |          |   |        |     |          |   |   |   |   |          |   |        |     |          |   |   |   |   |          |   |        |     |          |
| 2                                                                                                                                                                                                                                                                                                                                                                                                                                                                                                                                                                                                                                                                                                                                                                                                                                                                                                                                                                                                                                                                                                                                                                                     | Nanae      |                                     | 1              | C             | E            | V       | <b>B1</b>    | ladder      | smear    | 198/147/98        | <b>B1</b>      |   |   |   |   |           |   |        |         |           |   |   |   |   |           |   |        |         |           |   |   |   |   |          |   |        |     |          |   |   |   |   |          |   |        |     |          |   |   |   |   |          |   |        |     |          |   |   |   |   |          |   |        |     |          |   |   |   |   |          |   |        |     |          |   |   |   |   |          |   |        |     |          |
|                                                                                                                                                                                                                                                                                                                                                                                                                                                                                                                                                                                                                                                                                                                                                                                                                                                                                                                                                                                                                                                                                                                                                                                       |            |                                     | 2              | C             | E            | V       | <b>B1</b>    | ladder      | smear    | 198/147/98        | <b>B1</b>      |   |   |   |   |           |   |        |         |           |   |   |   |   |           |   |        |         |           |   |   |   |   |          |   |        |     |          |   |   |   |   |          |   |        |     |          |   |   |   |   |          |   |        |     |          |   |   |   |   |          |   |        |     |          |   |   |   |   |          |   |        |     |          |   |   |   |   |          |   |        |     |          |
|                                                                                                                                                                                                                                                                                                                                                                                                                                                                                                                                                                                                                                                                                                                                                                                                                                                                                                                                                                                                                                                                                                                                                                                       |            |                                     | 3              | C             | E            | V       | <b>B1</b>    | ladder      | smear    | 198/147/98        | <b>B1</b>      |   |   |   |   |           |   |        |         |           |   |   |   |   |           |   |        |         |           |   |   |   |   |          |   |        |     |          |   |   |   |   |          |   |        |     |          |   |   |   |   |          |   |        |     |          |   |   |   |   |          |   |        |     |          |   |   |   |   |          |   |        |     |          |   |   |   |   |          |   |        |     |          |
|                                                                                                                                                                                                                                                                                                                                                                                                                                                                                                                                                                                                                                                                                                                                                                                                                                                                                                                                                                                                                                                                                                                                                                                       |            |                                     | 4              | C             | E            | V       | <b>B1</b>    | unknown     | smear    | 198/147/98        | <b>B1</b>      |   |   |   |   |           |   |        |         |           |   |   |   |   |           |   |        |         |           |   |   |   |   |          |   |        |     |          |   |   |   |   |          |   |        |     |          |   |   |   |   |          |   |        |     |          |   |   |   |   |          |   |        |     |          |   |   |   |   |          |   |        |     |          |   |   |   |   |          |   |        |     |          |
| 3                                                                                                                                                                                                                                                                                                                                                                                                                                                                                                                                                                                                                                                                                                                                                                                                                                                                                                                                                                                                                                                                                                                                                                                     | Ebetsu     |                                     | 1              | C             | E            | V       | <b>B1</b>    | ladder      | smear    | 198/147/98        | <b>B1</b>      |   |   |   |   |           |   |        |         |           |   |   |   |   |           |   |        |         |           |   |   |   |   |          |   |        |     |          |   |   |   |   |          |   |        |     |          |   |   |   |   |          |   |        |     |          |   |   |   |   |          |   |        |     |          |   |   |   |   |          |   |        |     |          |   |   |   |   |          |   |        |     |          |
|                                                                                                                                                                                                                                                                                                                                                                                                                                                                                                                                                                                                                                                                                                                                                                                                                                                                                                                                                                                                                                                                                                                                                                                       |            |                                     | 2              | C             | E            | V       | <b>B1</b>    | ladder      | smear    | 198/147/98        | <b>B1</b>      |   |   |   |   |           |   |        |         |           |   |   |   |   |           |   |        |         |           |   |   |   |   |          |   |        |     |          |   |   |   |   |          |   |        |     |          |   |   |   |   |          |   |        |     |          |   |   |   |   |          |   |        |     |          |   |   |   |   |          |   |        |     |          |   |   |   |   |          |   |        |     |          |
|                                                                                                                                                                                                                                                                                                                                                                                                                                                                                                                                                                                                                                                                                                                                                                                                                                                                                                                                                                                                                                                                                                                                                                                       |            |                                     | 3              | C             | E            | V       | <b>B1</b>    | faint smear | smear    | 198/147/98        | <b>B1</b>      |   |   |   |   |           |   |        |         |           |   |   |   |   |           |   |        |         |           |   |   |   |   |          |   |        |     |          |   |   |   |   |          |   |        |     |          |   |   |   |   |          |   |        |     |          |   |   |   |   |          |   |        |     |          |   |   |   |   |          |   |        |     |          |   |   |   |   |          |   |        |     |          |
|                                                                                                                                                                                                                                                                                                                                                                                                                                                                                                                                                                                                                                                                                                                                                                                                                                                                                                                                                                                                                                                                                                                                                                                       |            |                                     | 4              | C             | E            | V       | <b>B1</b>    | faint smear | smear    | 198/147/98        | <b>B1</b>      |   |   |   |   |           |   |        |         |           |   |   |   |   |           |   |        |         |           |   |   |   |   |          |   |        |     |          |   |   |   |   |          |   |        |     |          |   |   |   |   |          |   |        |     |          |   |   |   |   |          |   |        |     |          |   |   |   |   |          |   |        |     |          |   |   |   |   |          |   |        |     |          |
|                                                                                                                                                                                                                                                                                                                                                                                                                                                                                                                                                                                                                                                                                                                                                                                                                                                                                                                                                                                                                                                                                                                                                                                       |            |                                     | 5              | C             | E            | V       | <b>B1</b>    | faint smear | smear    | 198/147/98        | <b>B1</b>      |   |   |   |   |           |   |        |         |           |   |   |   |   |           |   |        |         |           |   |   |   |   |          |   |        |     |          |   |   |   |   |          |   |        |     |          |   |   |   |   |          |   |        |     |          |   |   |   |   |          |   |        |     |          |   |   |   |   |          |   |        |     |          |   |   |   |   |          |   |        |     |          |
|                                                                                                                                                                                                                                                                                                                                                                                                                                                                                                                                                                                                                                                                                                                                                                                                                                                                                                                                                                                                                                                                                                                                                                                       |            |                                     | 6              | C             | E            | V       | <b>B1</b>    | faint smear | smear    | 198/147/98        | <b>B1</b>      |   |   |   |   |           |   |        |         |           |   |   |   |   |           |   |        |         |           |   |   |   |   |          |   |        |     |          |   |   |   |   |          |   |        |     |          |   |   |   |   |          |   |        |     |          |   |   |   |   |          |   |        |     |          |   |   |   |   |          |   |        |     |          |   |   |   |   |          |   |        |     |          |
|                                                                                                                                                                                                                                                                                                                                                                                                                                                                                                                                                                                                                                                                                                                                                                                                                                                                                                                                                                                                                                                                                                                                                                                       |            |                                     | 7              | C             | E            | V       | <b>B1</b>    | faint smear | smear    | 198/147/98        | <b>B1</b>      |   |   |   |   |           |   |        |         |           |   |   |   |   |           |   |        |         |           |   |   |   |   |          |   |        |     |          |   |   |   |   |          |   |        |     |          |   |   |   |   |          |   |        |     |          |   |   |   |   |          |   |        |     |          |   |   |   |   |          |   |        |     |          |   |   |   |   |          |   |        |     |          |
|                                                                                                                                                                                                                                                                                                                                                                                                                                                                                                                                                                                                                                                                                                                                                                                                                                                                                                                                                                                                                                                                                                                                                                                       |            |                                     | 8              | C             | E            | V       | <b>B1</b>    | faint smear | smear    | 245/198           | <b>A</b>       |   |   |   |   |           |   |        |         |           |   |   |   |   |           |   |        |         |           |   |   |   |   |          |   |        |     |          |   |   |   |   |          |   |        |     |          |   |   |   |   |          |   |        |     |          |   |   |   |   |          |   |        |     |          |   |   |   |   |          |   |        |     |          |   |   |   |   |          |   |        |     |          |
| <table border="1" style="border-style: dashed; border-width: 2px;"> <tbody> <tr> <td>1</td> <td>-</td> <td>-</td> <td>-</td> <td><b>B1</b></td> <td>-</td> <td>smear</td> <td>296/147</td> <td><b>B1</b></td> </tr> <tr> <td>2</td> <td>-</td> <td>-</td> <td>-</td> <td><b>B1</b></td> <td>-</td> <td>smear</td> <td>296/147</td> <td><b>B1</b></td> </tr> </tbody> </table>                                                                                                                                                                                                                                                                                                                                                                                                                                                                                                                                                                                                                                                                                                                                                                                                         |            |                                     |                |               |              |         |              |             |          |                   |                | 1 | - | - | - | <b>B1</b> | - | smear  | 296/147 | <b>B1</b> | 2 | - | - | - | <b>B1</b> | - | smear  | 296/147 | <b>B1</b> |   |   |   |   |          |   |        |     |          |   |   |   |   |          |   |        |     |          |   |   |   |   |          |   |        |     |          |   |   |   |   |          |   |        |     |          |   |   |   |   |          |   |        |     |          |   |   |   |   |          |   |        |     |          |
| 1                                                                                                                                                                                                                                                                                                                                                                                                                                                                                                                                                                                                                                                                                                                                                                                                                                                                                                                                                                                                                                                                                                                                                                                     | -          | -                                   | -              | <b>B1</b>     | -            | smear   | 296/147      | <b>B1</b>   |          |                   |                |   |   |   |   |           |   |        |         |           |   |   |   |   |           |   |        |         |           |   |   |   |   |          |   |        |     |          |   |   |   |   |          |   |        |     |          |   |   |   |   |          |   |        |     |          |   |   |   |   |          |   |        |     |          |   |   |   |   |          |   |        |     |          |   |   |   |   |          |   |        |     |          |
| 2                                                                                                                                                                                                                                                                                                                                                                                                                                                                                                                                                                                                                                                                                                                                                                                                                                                                                                                                                                                                                                                                                                                                                                                     | -          | -                                   | -              | <b>B1</b>     | -            | smear   | 296/147      | <b>B1</b>   |          |                   |                |   |   |   |   |           |   |        |         |           |   |   |   |   |           |   |        |         |           |   |   |   |   |          |   |        |     |          |   |   |   |   |          |   |        |     |          |   |   |   |   |          |   |        |     |          |   |   |   |   |          |   |        |     |          |   |   |   |   |          |   |        |     |          |   |   |   |   |          |   |        |     |          |

**Table S1** continued

|   |   |   |   |           |   |       |         |           |
|---|---|---|---|-----------|---|-------|---------|-----------|
| 3 | - | - | - | <b>B1</b> | - | smear | 296/147 | <b>B1</b> |
| 4 | - | - | - | <b>B1</b> | - | smear | 296/147 | <b>B1</b> |
| 5 | - | - | - | <b>B1</b> | - | smear | 296/147 | <b>B1</b> |
| 6 | - | - | - | <b>B1</b> | - | smear | 296/147 | <b>B1</b> |
| 7 | - | - | - | <b>B1</b> | - | smear | 296/147 | <b>B1</b> |
| 8 | - | - | - | <b>B1</b> | - | smear | 296/147 | <b>B1</b> |

|   |          |            |   |   |     |          |           |             |                |            |           |
|---|----------|------------|---|---|-----|----------|-----------|-------------|----------------|------------|-----------|
| 4 | Abashiri | 1          | A | D | IV  | <b>A</b> | smear     | ladder      | 245/198        | <b>A</b>   |           |
|   |          | 2          | A | A | I   | <b>A</b> | smear     | ladder      | 245/198        | <b>A</b>   |           |
|   |          | 3          | A | D | IV  | <b>A</b> | smear     | ladder      | 245/198        | <b>A</b>   |           |
|   |          | 4          | A | C | II  | <b>A</b> | smear     | ladder      | 245/198        | <b>A</b>   |           |
|   |          | 5          | A | A | I   | <b>A</b> | smear     | ladder      | 245/198        | <b>A</b>   |           |
|   |          | 6          | A | A | I   | <b>A</b> | smear     | ladder      | 245/198        | <b>A</b>   |           |
|   |          | 7          | A | C | II  | <b>A</b> | smear     | ladder      | 245/198        | <b>A</b>   |           |
|   |          | 8          | A | A | I   | <b>A</b> | smear     | ladder      | 245/198        | <b>A</b>   |           |
|   |          | 9          | B | B | III | <b>A</b> | smear     | smear       | 245/198/147/98 | <b>C</b>   |           |
|   |          | 10         | B | B | III | <b>A</b> | smear     | smear       | 245/198/147/98 | <b>C</b>   |           |
|   |          | 11         | B | B | III | <b>A</b> | smear     | smear       | 245/198/147/98 | <b>C</b>   |           |
|   |          | 12         | B | B | III | <b>A</b> | smear     | smear       | 245/198/147/98 | <b>C</b>   |           |
|   |          | 13         | B | B | III | <b>A</b> | smear     | smear       | 245/198/147/98 | <b>C</b>   |           |
|   |          | 14         | B | B | III | <b>A</b> | smear     | smear       | 245/198/147/98 | <b>C</b>   |           |
|   |          | 15         | B | B | III | <b>A</b> | smear     | smear       | 245/198/147/98 | <b>C</b>   |           |
|   |          | 16         | B | B | III | <b>A</b> | smear     | smear       | 245/198/147/98 | <b>C</b>   |           |
|   |          | 17         | B | B | III | <b>A</b> | smear     | smear       | 245/198/147/98 | <b>C</b>   |           |
|   |          | 18         | B | B | III | <b>A</b> | smear     | smear       | 245/198/147/98 | <b>C</b>   |           |
|   |          | 19         | B | B | III | <b>A</b> | smear     | smear       | 245/198/147/98 | <b>C</b>   |           |
|   |          | 20         | B | B | III | <b>A</b> | smear     | smear       | 245/198/147/98 | <b>C</b>   |           |
|   |          | 21         | B | B | III | <b>A</b> | smear     | smear       | 245/198/147/98 | <b>C</b>   |           |
| 5 | Akita    | Kakunodate | 1 | C | E   | V        | <b>B1</b> | faint smear | smear          | 198/147/98 | <b>B1</b> |
|   |          |            | 2 | C | E   | V        | <b>B1</b> | faint smear | smear          | 198/147/98 | <b>B1</b> |
|   |          |            | 3 | C | E   | V        | <b>B1</b> | faint smear | smear          | 198/147/98 | <b>B1</b> |
|   |          |            | 4 | C | E   | V        | <b>B1</b> | faint smear | smear          | 198/147/98 | <b>B1</b> |
|   |          |            | 5 | C | E   | V        | <b>B1</b> | faint smear | smear          | 198/147/98 | <b>B1</b> |
|   |          |            | 6 | C | E   | V        | <b>B1</b> | faint smear | smear          | 198/147/98 | <b>B1</b> |
|   |          |            | 7 | C | E   | V        | <b>B1</b> | faint smear | smear          | 198/147/98 | <b>B1</b> |
|   |          |            | 8 | C | E   | V        | <b>B1</b> | faint smear | smear          | 198/147/98 | <b>B1</b> |

Table S1 continued

|   |   |   |   |           |   |       |         |           |
|---|---|---|---|-----------|---|-------|---------|-----------|
| 1 | - | - | - | <b>B1</b> | - | smear | 296/147 | <b>B1</b> |
| 2 | - | - | - | <b>B1</b> | - | smear | 296/147 | <b>B1</b> |
| 3 | - | - | - | <b>B1</b> | - | smear | 296/147 | <b>B1</b> |
| 4 | - | - | - | <b>B1</b> | - | smear | 296/147 | <b>B1</b> |
| 5 | - | - | - | <b>B1</b> | - | smear | 296/147 | <b>B1</b> |
| 6 | - | - | - | <b>B1</b> | - | smear | 296/147 | <b>B1</b> |
| 7 | - | - | - | <b>B1</b> | - | smear | 296/147 | <b>B1</b> |
| 8 | - | - | - | <b>B1</b> | - | smear | 296/147 | <b>B1</b> |

6 Miyagi Naruko

|   |   |   |   |          |       |        |         |          |
|---|---|---|---|----------|-------|--------|---------|----------|
| 1 | C | I | X | <b>A</b> | smear | ladder | 245/198 | <b>A</b> |
| 2 | C | I | X | <b>A</b> | smear | ladder | 245/198 | <b>A</b> |
| 3 | C | I | X | <b>A</b> | smear | ladder | 245/198 | <b>A</b> |
| 4 | C | I | X | <b>A</b> | smear | ladder | 245/198 | <b>A</b> |
| 5 | C | I | X | <b>A</b> | smear | ladder | 245/198 | <b>A</b> |
| 6 | C | I | X | <b>A</b> | smear | ladder | 245/198 | <b>A</b> |
| 7 | C | I | X | <b>A</b> | smear | ladder | 245/198 | <b>A</b> |
| 8 | C | I | X | <b>A</b> | smear | ladder | 245/198 | <b>A</b> |

|   |   |   |   |          |   |        |     |          |
|---|---|---|---|----------|---|--------|-----|----------|
| 1 | - | - | - | <b>A</b> | - | ladder | 443 | <b>A</b> |
| 2 | - | - | - | <b>A</b> | - | ladder | 443 | <b>A</b> |
| 3 | - | - | - | <b>A</b> | - | ladder | 443 | <b>A</b> |
| 4 | - | - | - | <b>A</b> | - | ladder | 443 | <b>A</b> |
| 5 | - | - | - | <b>A</b> | - | ladder | 443 | <b>A</b> |
| 6 | - | - | - | <b>A</b> | - | ladder | 443 | <b>A</b> |
| 7 | - | - | - | <b>A</b> | - | ladder | 443 | <b>A</b> |
| 8 | - | - | - | <b>A</b> | - | ladder | 443 | <b>A</b> |

7 Fukui Obama

|   |   |   |   |           |             |         |                |               |
|---|---|---|---|-----------|-------------|---------|----------------|---------------|
| 1 | C | E | V | <b>B1</b> | faint smear | unknown | 245/198/147/98 | <b>C/A×B1</b> |
| 2 | C | E | V | <b>B1</b> | faint smear | smear   | 245/198/147/98 | <b>C/A×B1</b> |
| 3 | C | E | V | <b>B1</b> | faint smear | smear   | 245/198/147/98 | <b>C/A×B1</b> |
| 4 | C | E | V | <b>B1</b> | faint smear | smear   | 198/147/98     | <b>B1</b>     |
| 5 | C | E | V | <b>B1</b> | faint smear | smear   | 198/147/98     | <b>B1</b>     |
| 6 | C | E | V | <b>B1</b> | faint smear | smear   | 198/147/98     | <b>B1</b>     |
| 7 | C | E | V | <b>B1</b> | faint smear | smear   | 198/147/98     | <b>B1</b>     |
| 8 | C | E | V | <b>B1</b> | faint smear | smear   | 198/147/98     | <b>B1</b>     |

|   |   |   |   |           |   |       |         |           |
|---|---|---|---|-----------|---|-------|---------|-----------|
| 1 | - | - | - | <b>B1</b> | - | smear | 296/147 | <b>B1</b> |
|---|---|---|---|-----------|---|-------|---------|-----------|

Table S1 continued

|   |   |   |   |           |   |       |         |           |
|---|---|---|---|-----------|---|-------|---------|-----------|
| 2 | - | - | - | <b>B1</b> | - | smear | 296/147 | <b>B1</b> |
| 3 | - | - | - | <b>B1</b> | - | smear | 296/147 | <b>B1</b> |
| 4 | - | - | - | <b>B1</b> | - | smear | 296/147 | <b>B1</b> |
| 5 | - | - | - | <b>B1</b> | - | smear | 296/147 | <b>B1</b> |
| 6 | - | - | - | <b>B1</b> | - | smear | 296/147 | <b>B1</b> |
| 7 | - | - | - | <b>B1</b> | - | smear | 296/147 | <b>B1</b> |
| 8 | - | - | - | <b>B1</b> | - | smear | 296/147 | <b>B1</b> |

|   |         |       |   |   |   |     |                 |             |       |     |           |
|---|---------|-------|---|---|---|-----|-----------------|-------------|-------|-----|-----------|
| 8 | Tochigi | Nikko | 1 | C | F | VII | <b>B1 or B2</b> | faint smear | smear | 443 | <b>B2</b> |
|   |         |       | 2 | C | F | VII | <b>B1 or B2</b> | faint smear | smear | 443 | <b>B2</b> |
|   |         |       | 3 | C | F | VII | <b>B1 or B2</b> | faint smear | smear | 443 | <b>B2</b> |
|   |         |       | 4 | C | F | VII | <b>B1 or B2</b> | faint smear | smear | 443 | <b>B2</b> |
|   |         |       | 5 | C | F | VII | <b>B1 or B2</b> | faint smear | smear | 443 | <b>B2</b> |
|   |         |       | 6 | C | F | VII | <b>B1 or B2</b> | faint smear | smear | 443 | <b>B2</b> |
|   |         |       | 7 | C | F | VII | <b>B1 or B2</b> | faint smear | smear | 443 | <b>B2</b> |
|   |         |       | 8 | C | F | VII | <b>B1 or B2</b> | faint smear | smear | 443 | <b>B2</b> |

|   |   |   |     |                 |   |       |     |           |
|---|---|---|-----|-----------------|---|-------|-----|-----------|
| 1 | C | F | VII | <b>B1 or B2</b> | - | smear | 443 | <b>B2</b> |
| 2 | C | F | VII | <b>B1 or B2</b> | - | smear | 443 | <b>B2</b> |
| 3 | C | F | VII | <b>B1 or B2</b> | - | smear | 443 | <b>B2</b> |
| 4 | C | F | VII | <b>B1 or B2</b> | - | smear | 443 | <b>B2</b> |
| 5 | C | F | VII | <b>B1 or B2</b> | - | smear | 443 | <b>B2</b> |
| 6 | C | F | VII | <b>B1 or B2</b> | - | smear | 443 | <b>B2</b> |
| 7 | C | F | VII | <b>B1 or B2</b> | - | smear | 443 | <b>B2</b> |
| 8 | C | F | VII | <b>B1 or B2</b> | - | smear | 443 | <b>B2</b> |

|   |         |       |   |   |   |     |                 |             |       |     |           |
|---|---------|-------|---|---|---|-----|-----------------|-------------|-------|-----|-----------|
| 9 | Saitama | Hanyu | 1 | C | F | VII | <b>B1 or B2</b> | faint smear | smear | 443 | <b>B2</b> |
|   |         |       | 2 | C | E | V   | <b>B1</b>       | faint smear | smear | 443 | <b>B2</b> |
|   |         |       | 3 | C | F | VII | <b>B1 or B2</b> | faint smear | smear | 443 | <b>B2</b> |
|   |         |       | 4 | C | F | VII | <b>B1 or B2</b> | faint smear | smear | 443 | <b>B2</b> |
|   |         |       | 5 | C | F | VII | <b>B1 or B2</b> | faint smear | smear | 443 | <b>B2</b> |
|   |         |       | 6 | C | G | VI  | <b>B2</b>       | faint smear | smear | 443 | <b>B2</b> |
|   |         |       | 7 | C | F | VII | <b>B1 or B2</b> | faint smear | smear | 443 | <b>B2</b> |
|   |         |       | 8 | C | F | VII | <b>B1 or B2</b> | faint smear | smear | 443 | <b>B2</b> |

|   |   |   |     |                 |   |       |     |           |
|---|---|---|-----|-----------------|---|-------|-----|-----------|
| 1 | C | F | VII | <b>B1 or B2</b> | - | smear | 443 | <b>B2</b> |
| 2 | C | E | V   | <b>B1</b>       | - | smear | 443 | <b>B2</b> |

Table S1 continued

|   |   |   |     |                 |   |       |     |           |
|---|---|---|-----|-----------------|---|-------|-----|-----------|
| 3 | C | F | VII | <b>B1 or B2</b> | - | smear | 443 | <b>B2</b> |
| 4 | C | F | VII | <b>B1 or B2</b> | - | smear | 443 | <b>B2</b> |
| 5 | C | F | VII | <b>B1 or B2</b> | - | smear | 443 | <b>B2</b> |
| 6 | C | F | VII | <b>B1 or B2</b> | - | smear | 443 | <b>B2</b> |
| 7 | C | F | VII | <b>B1 or B2</b> | - | smear | 443 | <b>B2</b> |
| 8 | C | F | VII | <b>B1 or B2</b> | - | smear | 443 | <b>B2</b> |

|    |       |        |   |   |   |     |                 |             |        |                |              |
|----|-------|--------|---|---|---|-----|-----------------|-------------|--------|----------------|--------------|
| 10 | Chiba | Futtsu | 1 | C | F | VII | <b>B1 or B2</b> | faint smear | smear  | 443            | <b>B2</b>    |
|    |       |        | 2 | C | F | VII | <b>B1 or B2</b> | faint smear | smear  | 443            | <b>B2</b>    |
|    |       |        | 3 | C | F | VII | <b>B1 or B2</b> | faint smear | smear  | 443            | <b>B2</b>    |
|    |       |        | 4 | C | E | V   | <b>B1</b>       | faint smear | smear  | 198/147/98     | <b>B1</b>    |
|    |       |        | 5 | C | F | VII | <b>B1 or B2</b> | faint smear | smear  | 443            | <b>B2</b>    |
|    |       |        | 6 | C | F | VII | <b>B1 or B2</b> | faint smear | smear  | 443/198/147/98 | <b>B1xB2</b> |
|    |       |        | 7 | E | F | XI  | <b>A</b>        | smear       | ladder | 245/198        | <b>A</b>     |
|    |       |        | 8 | C | F | VII | <b>B1 or B2</b> | smear       | ladder | 443/245/198    | <b>AxB2</b>  |

|   |   |   |     |                 |   |        |             |              |
|---|---|---|-----|-----------------|---|--------|-------------|--------------|
| 1 | C | F | VII | <b>B1 or B2</b> | - | smear  | 443         | <b>B2</b>    |
| 2 | C | F | VII | <b>B1 or B2</b> | - | smear  | 443         | <b>B2</b>    |
| 3 | C | F | VII | <b>B1 or B2</b> | - | smear  | 443         | <b>B2</b>    |
| 4 | C | E | V   | <b>B1</b>       | - | smear  | 296/147     | <b>B1</b>    |
| 5 | C | F | VII | <b>B1 or B2</b> | - | smear  | 443         | <b>B2</b>    |
| 6 | C | F | VII | <b>B1 or B2</b> | - | smear  | 443/296/147 | <b>B1xB2</b> |
| 7 | E | F | XI  | <b>A</b>        | - | ladder | 443         | <b>A</b>     |
| 8 | C | F | VII | <b>B1 or B2</b> | - | smear  | 443         | <b>B2</b>    |

|    |        |      |   |   |   |     |                 |             |        |     |           |
|----|--------|------|---|---|---|-----|-----------------|-------------|--------|-----|-----------|
| 11 | Nagano | Ueda | 1 | C | F | VII | <b>B1 or B2</b> | faint smear | smear  | 443 | <b>B2</b> |
|    |        |      | 2 | C | F | VII | <b>B1 or B2</b> | faint smear | smear  | 443 | <b>B2</b> |
|    |        |      | 3 | C | F | VII | <b>B1 or B2</b> | faint smear | smear  | 443 | <b>B2</b> |
|    |        |      | 4 | C | F | VII | <b>B1 or B2</b> | faint smear | smear  | 443 | <b>B2</b> |
|    |        |      | 5 | C | F | VII | <b>B1 or B2</b> | faint smear | smear  | 443 | <b>B2</b> |
|    |        |      | 6 | C | F | VII | <b>B1 or B2</b> | faint smear | smear  | 443 | <b>B2</b> |
|    |        |      | 7 | C | E | V   | <b>B1</b>       | faint smear | smear  | 443 | <b>B2</b> |
|    |        |      | 8 | C | F | VII | <b>B1 or B2</b> | faint smear | ladder | 443 | <b>B2</b> |

|   |   |   |     |                 |   |       |     |           |
|---|---|---|-----|-----------------|---|-------|-----|-----------|
| 1 | C | F | VII | <b>B1 or B2</b> | - | smear | 443 | <b>B2</b> |
| 2 | C | F | VII | <b>B1 or B2</b> | - | smear | 443 | <b>B2</b> |
| 3 | C | F | VII | <b>B1 or B2</b> | - | smear | 443 | <b>B2</b> |

**Table S1** continued

|    |           |        |   |   |   |     |                 |             |             |            |           |
|----|-----------|--------|---|---|---|-----|-----------------|-------------|-------------|------------|-----------|
|    |           |        | 4 | C | F | VII | <b>B1 or B2</b> | -           | smear       | 443        | <b>B2</b> |
|    |           |        | 5 | C | F | VII | <b>B1 or B2</b> | -           | smear       | 443        | <b>B2</b> |
|    |           |        | 6 | C | F | VII | <b>B1 or B2</b> | -           | smear       | 443        | <b>B2</b> |
|    |           |        | 7 | C | E | V   | <b>B1</b>       | -           | smear       | 443        | <b>B2</b> |
|    |           |        | 8 | C | F | VII | <b>B1 or B2</b> | -           | smear       | 443        | <b>B2</b> |
| 12 | Tokushima | Hiwasa | 1 | C | E | V   | <b>B1</b>       | ladder      | smear       | 198/147/98 | <b>B1</b> |
|    |           |        | 2 | C | E | V   | <b>B1</b>       | faint smear | smear       | 198/147/98 | <b>B1</b> |
|    |           |        | 3 | C | E | V   | <b>B1</b>       | faint smear | smear       | 198/147/98 | <b>B1</b> |
|    |           |        | 4 | C | E | V   | <b>B1</b>       | ladder      | smear       | 198/147/98 | <b>B1</b> |
|    |           |        | 5 | C | E | V   | <b>B1</b>       | faint smear | smear       | 198/147/98 | <b>B1</b> |
|    |           |        | 6 | C | E | V   | <b>B1</b>       | faint smear | faint smear | 245/198    | <b>A</b>  |
|    |           |        | 7 | C | E | V   | <b>B1</b>       | faint smear | smear       | 198/147/98 | <b>B1</b> |
|    |           |        | 8 | C | E | V   | <b>B1</b>       | faint smear | smear       | 198/147/98 | <b>B1</b> |
|    |           |        | 1 | - | - | -   | <b>B1</b>       | -           | smear       | 296/147    | <b>B1</b> |
|    |           |        | 2 | - | - | -   | <b>B1</b>       | -           | smear       | 296/147    | <b>B1</b> |
|    |           |        | 3 | - | - | -   | <b>B1</b>       | -           | smear       | 296/147    | <b>B1</b> |
|    |           |        | 4 | - | - | -   | <b>B1</b>       | -           | smear       | 296/147    | <b>B1</b> |
|    |           |        | 5 | - | - | -   | <b>B1</b>       | -           | smear       | 296/147    | <b>B1</b> |
|    |           |        | 6 | - | - | -   | <b>B1</b>       | -           | smear       | 296/147    | <b>B1</b> |
|    |           |        | 7 | - | - | -   | <b>B1</b>       | -           | smear       | 296/147    | <b>B1</b> |
|    |           |        | 8 | - | - | -   | <b>B1</b>       | -           | smear       | 296/147    | <b>B1</b> |

† MtDNA genome was determined using control region RFLP haplotypes (CR-RFLP). Nuclear genome was comprehensively determined from results of ManDra-A genotype, ManDra-B genotype, and improved *RAG1*-RFLP. Dashed boxes indicate previous results obtained from the same individuals including the *RAG1*-RFLP markers (standard methodology, not improved) described in Morishima et al. (2008) and Fujimoto et al. (2017).
